# Supplementary material for: Integrated Analysis of Transcriptome and Metabolome Reveals Differential Responses to Alternaria brassicicola Infection in Cabbage (Brassica oleracea var. capitata)
Source: MDPI journal article supplement (doi:10.3390/genes15050545), 2024-04-25
Supplement: s1 [file s1]

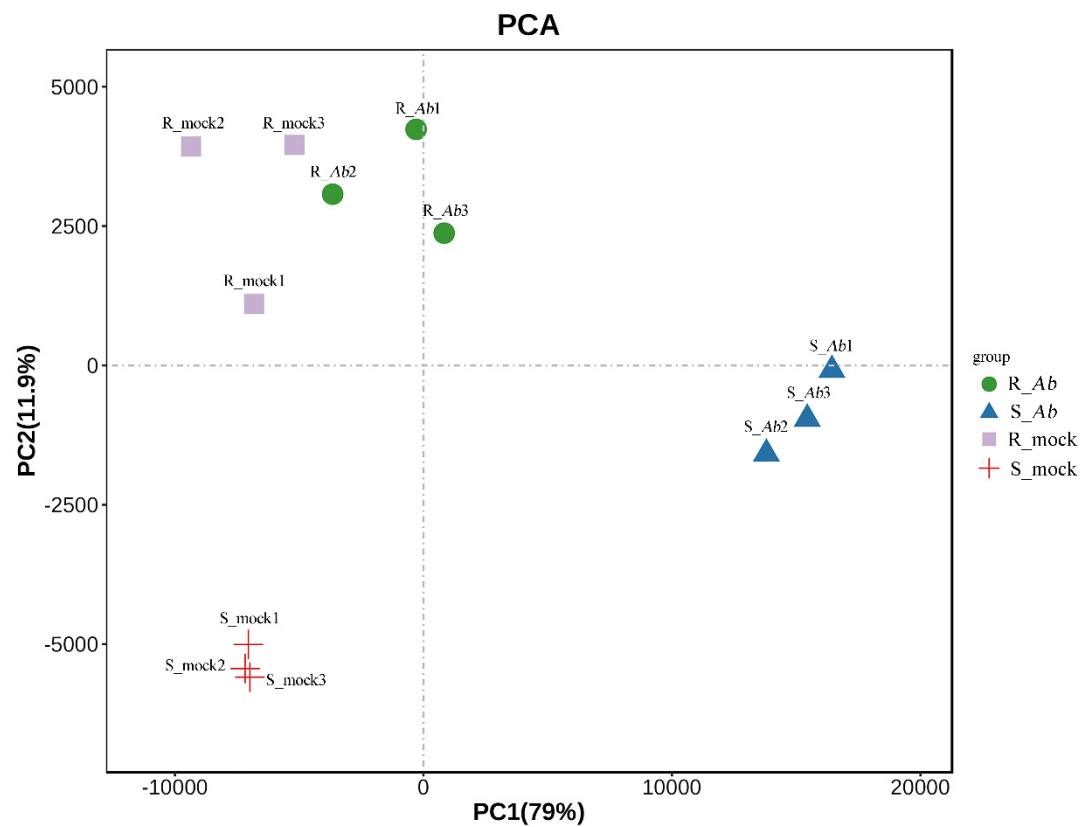

**Figure S1. Principal component analysis of the 12 RNA-Seq samples.**

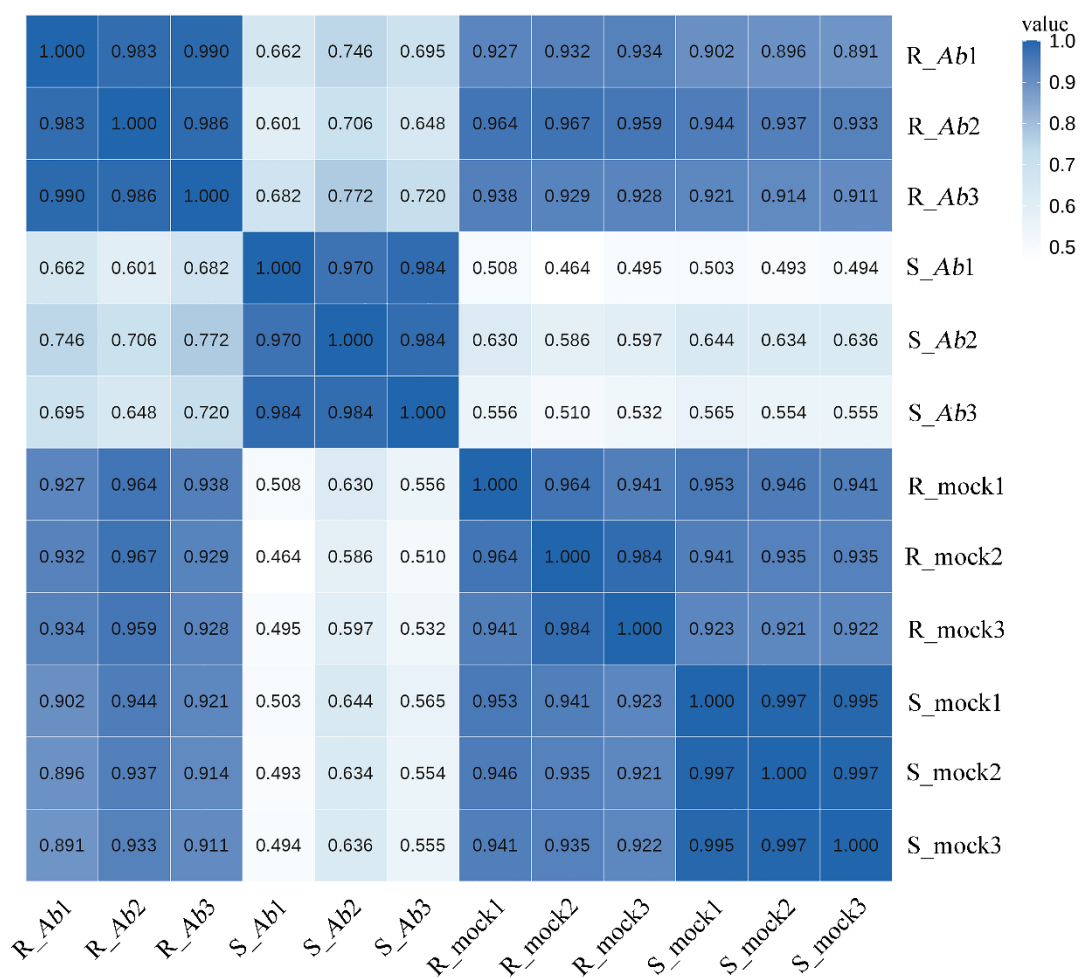

**Figure S2. Pearson correlation analysis of the 12 RNA-Seq samples.**

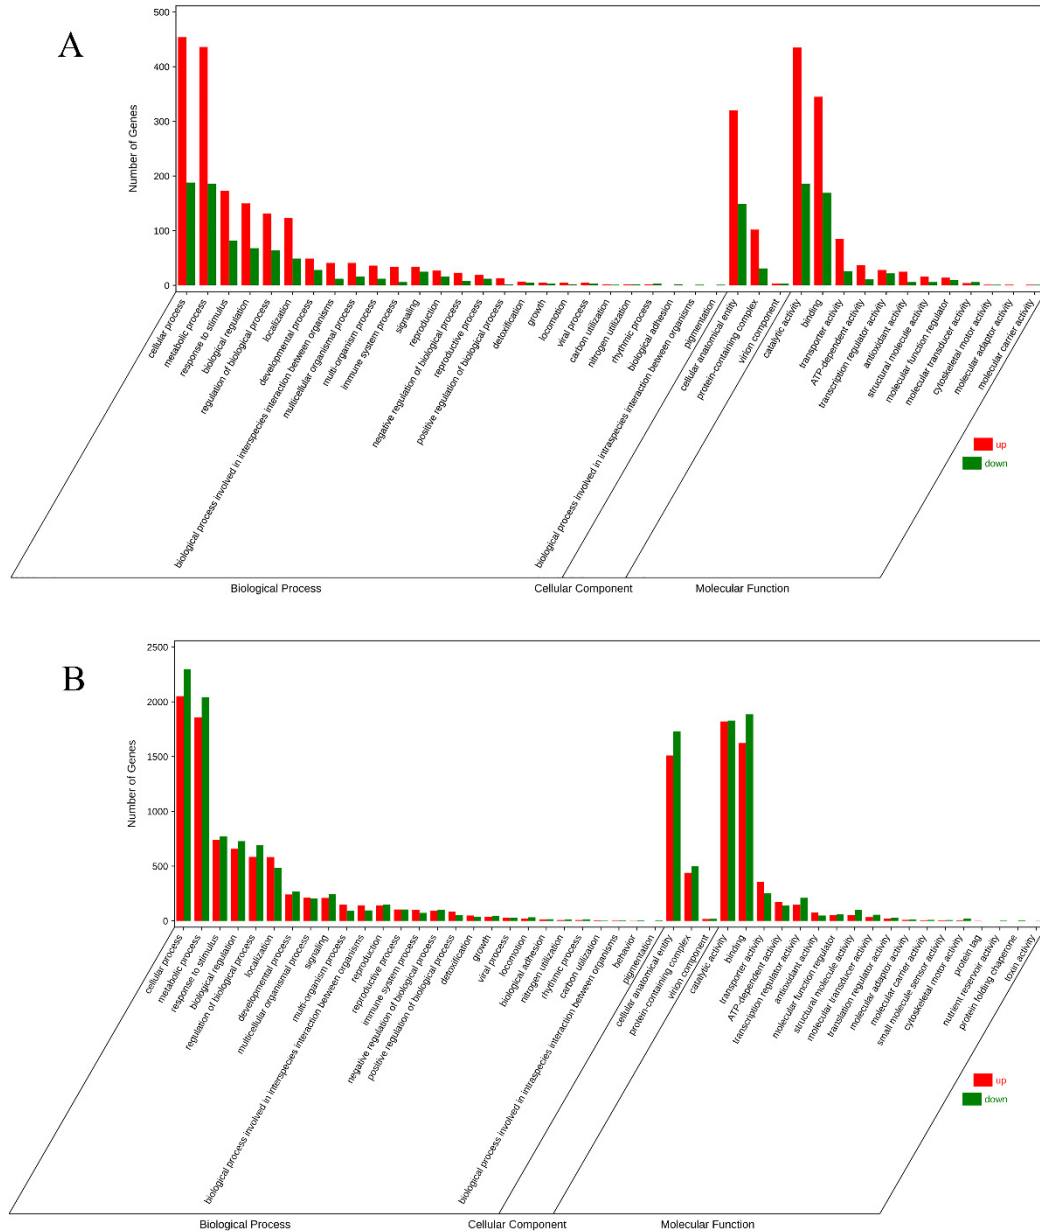

**Figure S3. GO enrichment analysis of DEGs in Bo257 (R\_mock vs. R\_Ab) and Bo190 (S\_mock vs. S\_Ab) after Ab infection.** A, GO enrichment analysis of DEGs in Bo257 (R\_mock vs. R\_Ab). B, GO enrichment analysis of DEGs in Bo190 (S\_mock vs. S\_Ab). The y-axis represents the total number of DEGs annotated to each GO process. The x-axis represents three ontologies, including biological processes, molecular functions, and cellular components. The red and green sections represent up-regulated and down-regulated DEGs, respectively.

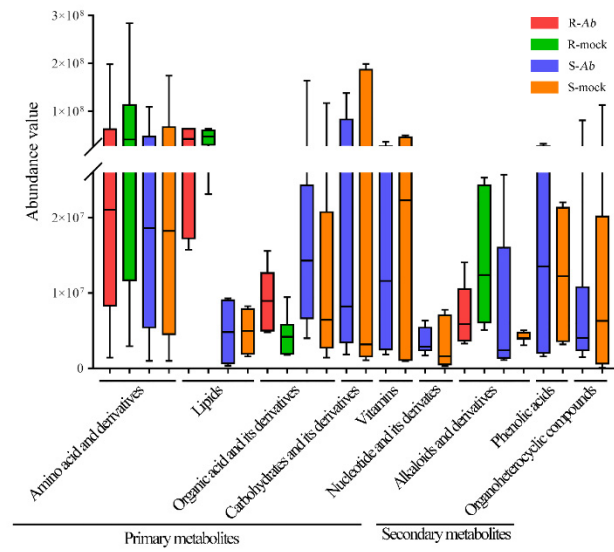

**Figure S4. Comparison of the metabolite abundance value in Bo257 (R\_mock vs. R\_Ab) and Bo190 (S\_mock vs. S\_Ab) after Ab infection.**
