# Supplementary material for: Integrated Analysis of Transcriptome and Metabolome Reveals Differential Responses to Alternaria brassicicola Infection in Cabbage (Brassica oleracea var. capitata)
Source: Genes (Basel). 2024 Apr 25;15(5):545. doi: 10.3390/genes15050545 (PMC11121261; doi:10.3390/genes15050545)
Supplement: Supplementary file 1 [file genes-15-00545-s001.zip › Supplementary tables S1-S4.xlsx]

## Sheet: Table S1
Table S1. Summary of RNA-Seq data for 12 samples.
Samples	Raw reads	Clean reads	rRNA mapped reads	Clean reads (removal of rRNAs)	Unmapped reads	Percentage	Unique mapped reads	Percentage	Multiple mapped reads	Percentage
R_Ab1	54685338	54398848	194344	54204504	3675036	0.0677995	48618071	0.896938	1911397	0.0352627
R_Ab2	48551980	48420240	203104	48217136	3179133	0.0659337	43341379	0.898879	1696624	0.0351872
R_Ab3	49905316	49760050	212516	49547534	3432009	0.069267	44470520	0.897532	1645005	0.0332005
S_Ab1	39983888	39810162	170560	39639602	3118871	0.0786807	35456055	0.89446	1064676	0.0268589
S_Ab2	38855976	38638552	131394	38507158	2965230	0.0770046	34506083	0.896095	1035845	0.0269001
S_Ab3	47190610	46971888	116134	46855754	3748162	0.0799936	41873101	0.89366	1234491	0.0263466
R_mock1	41339684	41139332	179210	40960122	2739401	0.0668797	36953076	0.902172	1267645	0.0309483
R_mock2	40396428	40198728	139460	40059268	2839582	0.0708845	35860883	0.895196	1358803	0.0339198
R_mock3	44341900	44138894	237850	43901044	2923156	0.0665851	39522678	0.900267	1455210	0.0331475
S_mock1	42423044	42304504	243720	42060784	3053233	0.072591	37791692	0.898502	1215859	0.0289072
S_mock2	37380110	37287772	117148	37170624	2634900	0.0708866	33470849	0.900465	1064875	0.0286483
S_mock3	47641868	47386440	164748	47221692	3512668	0.0743867	42381843	0.897508	1327181	0.0281053
Total reads	532696142	530455410	2110188	528345222	37821381	0.0715846	474246230	0.897607	16277611	0.0308087

## Sheet: Table S2
Table S2. The expression of genes involved in extracellular ROS production, JA signaling pathway, and indolic glucosinolate biosynthesis pathway in Bo257 (R_mock vs. R_Ab) and Bo190 (S_mock vs. S_Ab) after Ab infection.
Gene name	Full name	Arabidopsis ID	Cabbage ID	Description	R_Ab1_fpkm	R_Ab2_fpkm	R_Ab3_fpkm	S_Ab1_fpkm	S_Ab2_fpkm	S_Ab3_fpkm	R_mock1_fpkm	R_mock2_fpkm	R_mock3_fpkm	S_mock1_fpkm	S_mock2_fpkm	S_mock3_fpkm	R_mock_mean	R_Ab_mean	R_mock vs. R_Ab log2(fc)	PValue	FDR	S_mock_mean	S_Ab_mean	S_mock vs. S_Ab log2(fc)	PValue	FDR
Extracellular ROS production
RBOHA	RESPIRATORY BURST OXIDASE HOMOLOG A	AT5G07390	BolO_3g03610	Brassica napus respiratory burst oxidase homolog protein A-like	0	0	0	0	0	0	0	0	0	0	0	0	0.001	0.001	0	1	1	0.001	0.001	0	1	1
RBOHA	RESPIRATORY BURST OXIDASE HOMOLOG A	AT5G07390	BolO_3g03630	Brassica oleracea var. oleracea respiratory burst oxidase homolog protein A-like	0	0	0	0	0	0	0	0	0	0	0	0	0.001	0.001	0	1	1	0.001	0.001	0	1	1
RBOHA	RESPIRATORY BURST OXIDASE HOMOLOG A	AT5G07390	BolO_3g03640	Brassica oleracea var. oleracea respiratory burst oxidase homolog protein A-like	0	0	0	0	0	0	0	0	0	0	0	0	0.001	0.001	0	1	1	0.001	0.001	0	1	1
RBOHA	RESPIRATORY BURST OXIDASE HOMOLOG A	AT5G07390	BolO_9g67720	Brassica oleracea var. oleracea respiratory burst oxidase homolog protein A	0	0	0	0	0	0.022	0	0	0	0.05	0	0	0.001	0.001	0	1	1	0.0166667	0.00733333	-1.18442	0.828565	0.891265
RBOHB	RESPIRATORY BURST OXIDASE HOMOLOG B	AT1G09090	BolO_8g56470	Brassica oleracea var. oleracea respiratory burst oxidase homolog protein B-like	4.823	4.095	3.218	0	0.044	0.172	2.086	2.109	2.087	0	0	0	2.094	4.04533	0.949997	0.000222131	0.00800582	0.001	0.072	6.16993	0.0790157	0.16869
RBOHB	RESPIRATORY BURST OXIDASE HOMOLOG B	AT1G09090	BolO_8g56530	Brassica oleracea var. oleracea respiratory burst oxidase homolog protein B-like	2.029	1.482	1.147	1.809	1.221	1.352	0.949	0.831	0.86	0.555	0.512	0.381	0.88	1.55267	0.819173	0.0293402	0.256982	0.482667	1.46067	1.59753	3.77e-05	0.000167461
RBOHC	RESPIRATORY BURST OXIDASE HOMOLOG C	AT5G51060	BolO_1g20380	Brassica oleracea var. oleracea respiratory burst oxidase homolog protein C-like	0	0.144	0.071	0	0	0	0	0	0	0	0.097	0	0.001	0.0716667	6.16323	0.57961	0.954218	0.0323333	0.001	-5.01495	0.825539	0.890326
RBOHC	RESPIRATORY BURST OXIDASE HOMOLOG C	AT5G51060	BolO_3g18760	Brassica oleracea var. oleracea respiratory burst oxidase homolog protein C	3.704	3.167	3.126	2.566	2.274	1.996	1.011	1.043	5.159	0.392	0.52	1.038	2.40433	3.33233	0.470896	0.338547	0.847748	0.65	2.27867	1.80968	7.55e-07	4.25e-06
RBOHC	RESPIRATORY BURST OXIDASE HOMOLOG C	AT5G51060	BolO_6g15920	Brassica oleracea var. oleracea respiratory burst oxidase homolog protein C-like	0.411	0.293	0.942	0.498	0.172	0.674	0.064	0.033	0.208	0	0.179	0.057	0.101667	0.548667	2.43208	0.00770142	0.111036	0.0786667	0.448	2.50967	0.00925834	0.0261708
RBOHD	RESPIRATORY BURST OXIDASE HOMOLOG D	AT5G47910	BolO_7g40110	Brassica oleracea var. oleracea respiratory burst oxidase homolog protein D	26.501	19.508	27.627	44.241	44.744	49.493	4.664	3.013	23.275	9.796	10.737	11.134	10.3173	24.5453	1.25038	0.122976	0.560025	10.5557	46.1593	2.1286	7.73e-66	8.97e-64
RBOHD	RESPIRATORY BURST OXIDASE HOMOLOG D	AT5G47910	BolO_2g58060	Brassica oleracea var. oleracea respiratory burst oxidase homolog protein D-like	111.43	104.559	115.478	134.961	126.657	126.308	90.359	78.184	113.753	183.551	199.098	243.675	94.0987	110.489	0.231657	0.118345	0.550917	208.775	129.309	-0.691128	7.92e-06	3.88e-05
RBOHE	RESPIRATORY BURST OXIDASE HOMOLOG E	AT1G19230	BolO_5g17740	Brassica oleracea var. oleracea respiratory burst oxidase homolog protein E	0.029	0	0.031	0.02	0	0.017	0.188	0.019	0.017	0.019	0	0	0.0746667	0.02	-1.90046	0.258203	0.771186	0.00633333	0.0123333	0.961526	0.775186	0.890326
RBOHE	RESPIRATORY BURST OXIDASE HOMOLOG E	AT1G19230	BolO_8g49900	Brassica napus respiratory burst oxidase homolog protein E-like	0	0	0	0	0	0	0.021	0	0.039	0	0	0	0.02	0.001	-4.32193	0.497727	0.935023	0.001	0.001	0	1	1
RBOHF	RESPIRATORY BURST OXIDASE HOMOLOG F	AT1G64060	BolO_9g18490	Brassica oleracea var. oleracea respiratory burst oxidase homolog protein F	1.767	1.592	1.957	3.925	3.044	3.398	1.296	0.733	14.61	2.127	2.542	3.008	5.54633	1.772	-1.64616	0.177192	0.661544	2.559	3.45567	0.433384	0.027937	0.0691051
RBOHG	RESPIRATORY BURST OXIDASE HOMOLOG G	AT4G25090	BolO_7g56010	Brassica oleracea var. oleracea putative respiratory burst oxidase homolog protein G	0.017	0.038	0.076	0.024	0.025	0	0.046	0.047	0.257	0.091	0.104	0.635	0.116667	0.0436667	-1.41779	0.289465	0.800969	0.276667	0.0163333	-4.08226	0.00378795	0.0117753
RBOHG	RESPIRATORY BURST OXIDASE HOMOLOG G	AT4G25090	BolO_7g56060	Brassica rapa putative respiratory burst oxidase homolog protein G	0	0.425	0.013	0	0	0	0.057	0	0	0.037	0	0	0.019	0.146	2.9419	0.54881	0.954218	0.0123333	0.001	-3.62449	1	1
RBOHG	RESPIRATORY BURST OXIDASE HOMOLOG G	AT4G25090	BolO_7g56070	Brassica rapa putative respiratory burst oxidase homolog protein G	0.486	0.251	0.843	0.148	0	0.031	0.621	0.476	1.258	0.129	0	0	0.785	0.526667	-0.575803	0.418304	0.900621	0.043	0.0596667	0.472589	0.837991	0.897974
RBOHH	RESPIRATORY BURST OXIDASE HOMOLOG H	AT5G60010	BolO_2g13880	Brassica oleracea var. oleracea putative respiratory burst oxidase homolog protein H	0	0	0	0	0	0	0	0	0	0	0	0	0.001	0.001	0	1	1	0.001	0.001	0	1	1
RBOHI	RESPIRATORY BURST OXIDASE HOMOLOG I	AT4G11230	BolO_2g43670	Brassica oleracea var. oleracea probable respiratory burst oxidase homolog protein I	0.074	0.122	0.08	0	0.026	0	0.073	0	0.227	0	0	0	0.1	0.092	-0.120294	0.952255	0.986579	0.001	0.00866667	3.11548	0.801831	0.890326
RBOHJ	RESPIRATORY BURST OXIDASE HOMOLOG J	AT3G45810	BolO_3g68950	Brassica napus putative respiratory burst oxidase homolog protein J	0	0	0	0	0	0	0	0	0	0	0	0	0.001	0.001	0	1	1	0.001	0.001	0	1	1
PRX33/PRX34	PEROXIDASE 33/PEROXIDASE 34	AT3G49110/AT3G49120	BolO_1g29980	Brassica oleracea var. oleracea peroxidase 34	113.428	125.795	139.18	292.95	323.276	292.299	98.736	96.508	69.387	67.593	60.494	62.155	88.2103	126.134	0.515941	0.00803644	0.114236	63.414	302.842	2.25569	4.54e-98	1.01e-95
PRX33/PRX34	PEROXIDASE 33/PEROXIDASE 34	AT3G49110/AT3G49120	BolO_8g31190	Brassica oleracea var. oleracea peroxidase 34-like	0	0.219	0.043	0	0	0	0.365	3.661	4.961	0.103	0	0	2.99567	0.0873333	-5.1002	2.11e-06	0.000154336	0.0343333	0.001	-5.10154	0.665472	0.818133
PRX33/PRX34	PEROXIDASE 33/PEROXIDASE 34	AT3G49110/AT3G49120	BolO_8g31200	Brassica oleracea var. oleracea peroxidase 34-like	215.313	188.715	210.611	357.204	251.283	269.6	73.721	109.863	204.108	97.692	87.28	83.782	129.231	204.88	0.664828	0.0231248	0.223762	89.5847	292.696	1.70808	3.82e-32	1.24e-30
JA signaling pathway
JAR1	JASMONATE RESISTANT 1	AT2G46370	BolO_3g30060	Brassica oleracea var. oleracea jasmonic acid-amido synthetase JAR1-like	7.995	8.588	8.369	8.568	7.24	7.68	8.464	8.73	8.441	10.768	10.843	9.884	8.545	8.31733	-0.0389594	0.959382	0.989131	10.4983	7.82933	-0.423199	0.0329814	0.0799809
JAR1	JASMONATE RESISTANT 1	AT2G46370	BolO_4g01840	Brassica napus jasmonoyl--L-amino acid synthetase JAR1	33.77	38.201	38.43	49.991	61.261	47.956	69.577	45.972	32.763	54.741	47.839	47.487	49.4373	36.8003	-0.425882	0.152939	0.618274	50.0223	53.0693	0.0853061	0.269315	0.451216
JAR1	JASMONATE RESISTANT 1	AT2G46370	BolO_4g64280	Brassica napus jasmonoyl--L-amino acid synthetase JAR1-like	5.507	5.322	4.803	5.19	3.93	4.355	6.781	4.447	3.616	3.686	3.182	2.097	4.948	5.21067	0.0746225	0.754707	0.962927	2.98833	4.49167	0.58791	0.0164702	0.0434161
JAR1	JASMONATE RESISTANT 1	AT2G46370	BolO_9g54330	Brassica napus jasmonoyl--L-amino acid synthetase JAR1	0	0	0	0	0	0	0	0	0	0	0	0	0.001	0.001	0	1	1	0.001	0.001	0	1	1
COI1	CORONATINE INSENSITIVE 1	AT2G39940	BolO_3g25870	Brassica napus coronatine-insensitive protein 1	24.864	25.423	24.024	28.157	26.812	27.883	24.044	24.02	23.049	23.053	24.321	26.545	23.7043	24.7703	0.0634625	0.509428	0.938741	24.6397	27.6173	0.164591	0.0897093	0.187807
COI1	CORONATINE INSENSITIVE 1	AT2G39940	BolO_4g07840	Brassica oleracea var. oleracea coronatine-insensitive protein 1-like	12.819	10.698	12.802	7.21	7.194	6.045	15.051	12.602	12.293	12.336	10.716	10.403	13.3153	12.1063	-0.137327	0.573891	0.954218	11.1517	6.81633	-0.710192	0.000134156	0.000545308
COI1	CORONATINE INSENSITIVE 1	AT2G39940	BolO_4g59630	Brassica oleracea var. oleracea coronatine-insensitive protein 1-like	1.214	0.927	1.466	0.769	0.63	0.461	1.045	1.046	0.888	0.517	0.242	0.164	0.993	1.20233	0.275971	0.431618	0.908223	0.307667	0.62	1.0109	0.0824573	0.174918
COI1	CORONATINE INSENSITIVE 1	AT2G39940	BolO_4g59650	Brassica napus coronatine-insensitive protein 1	4.063	2.254	2.777	2.057	1.482	1.924	2.899	2.836	2.451	1.539	1.314	0.799	2.72867	3.03133	0.151756	0.560137	0.954218	1.21733	1.821	0.581007	0.0613826	0.136055
JAZ1	JASMONATE ZIM-DOMAIN PROTEIN 1	AT1G19180	BolO_5g17620	Brassica napus protein TIFY 10A	42.014	27.956	45.45	105.995	97.392	116.257	2.887	1.968	24.934	6.635	3.313	4.734	9.92967	38.4733	1.95404	0.0550117	0.369101	4.894	106.548	4.44435	1.12e-122	4.08e-120
JAZ2	JASMONATE ZIM-DOMAIN PROTEIN 2	AT1G74950	BolO_2g33530	Brassica napus protein TIFY 10B	5.93	5.069	5.652	24.706	18.793	20.85	6.818	7.543	9.478	11.54	7.934	11.52	7.94633	5.55033	-0.517715	0.0436908	0.323214	10.3313	21.4497	1.05393	3.84e-08	2.5e-07
JAZ2	JASMONATE ZIM-DOMAIN PROTEIN 2	AT1G74950	BolO_6g33110	Brassica oleracea var. oleracea protein TIFY 10B-like	5.044	5.405	11.152	5.452	3.663	2.452	22.524	7.556	15.566	3.561	3.44	4.234	15.2153	7.20033	-1.07939	0.0171767	0.187017	3.745	3.85567	0.0420146	0.78799	0.890326
JAZ2	JASMONATE ZIM-DOMAIN PROTEIN 2	AT1G74950	BolO_6g48870	Brassica napus protein TIFY 10B	4.634	7.053	7.101	10.369	8.107	9.799	7.749	5.335	8.617	9.042	4.847	6.815	7.23367	6.26267	-0.20795	0.551169	0.954218	6.90133	9.425	0.449618	0.0539242	0.121926
JAZ3	JASMONATE ZIM-DOMAIN PROTEIN 3	AT3G17860	BolO_1g45240	Brassica oleracea var. oleracea protein TIFY 6B-like	5.053	5.454	7.509	3.696	5.813	5.311	4.42	5.361	4.299	4.472	4.271	5.499	4.69333	6.00533	0.355631	0.156569	0.625738	4.74733	4.94	0.0573937	0.668979	0.821035
JAZ3	JASMONATE ZIM-DOMAIN PROTEIN 3	AT3G17860	BolO_5g49570	Brassica napus protein TIFY 6B-like	16.129	20.085	23.148	41.863	49.032	38.739	19.555	17.028	15.636	25.301	22.198	38.476	17.4063	19.7873	0.184965	0.322686	0.835392	28.6583	43.2113	0.592455	0.00196484	0.00648562
JAZ5	JASMONATE ZIM-DOMAIN PROTEIN 3	AT1G17380	BolO_5g15750	Brassica napus protein TIFY 11A-like	0.67	1.043	0.469	0.216	0.615	0.32	1.037	1.177	0.532	0.77	0.175	0.555	0.915333	0.727333	-0.331681	0.623893	0.956831	0.5	0.383667	-0.382075	0.690142	0.834156
JAZ5	JASMONATE ZIM-DOMAIN PROTEIN 5	AT1G17380	BolO_8g24760	Brassica oleracea var. oleracea protein TIFY 11A-like	35.502	25.366	37.75	135.773	126.005	138.944	4.204	4.336	17.549	7.907	3.602	5.247	8.69633	32.8727	1.91841	5.14e-05	0.002486	5.58533	133.574	4.57985	4.56e-119	1.56e-116
JAZ5	JASMONATE ZIM-DOMAIN PROTEIN 5	AT1G17380	BolO_8g50900	Brassica oleracea var. oleracea protein TIFY 11A-like	16.762	14.635	17.402	28.509	26.412	28.5	8.307	11.446	20.566	17.228	19.618	27.029	13.4397	16.2663	0.275392	0.315989	0.828938	21.2917	27.807	0.385159	0.0252696	0.0633105
JAZ6	JASMONATE ZIM-DOMAIN PROTEIN 6	AT1G72450	BolO_2g31330	Brassica oleracea var. oleracea protein TIFY 11B-like	77.417	57.136	82.701	142.217	122.137	141.163	25.68	27.027	40.509	36.908	37.179	41.547	31.072	72.418	1.22073	8.47e-08	8.84e-06	38.5447	135.172	1.8102	2.45e-45	1.48e-43
JAZ6	JASMONATE ZIM-DOMAIN PROTEIN 6	AT1G72450	BolO_6g46650	Brassica oleracea var. oleracea protein TIFY 11B	68.3	50.16	73.827	124.418	106.757	129.95	26.986	19.639	33.511	13.792	10.993	14.674	26.712	64.0957	1.26274	1.27e-07	1.29e-05	13.153	120.375	3.19407	2.77e-101	6.73e-99
JAZ7	JASMONATE ZIM-DOMAIN PROTEIN 7	AT2G34600	BolO_4g13710	Brassica oleracea var. oleracea protein TIFY 5B-like	0	0	0	0.202	2.293	2.216	0	0.399	0	0	0.218	0	0.133	0.001	-7.05528	0.58911	0.954218	0.0726667	1.57033	4.43363	0.00541633	0.0162656
JAZ7	JASMONATE ZIM-DOMAIN PROTEIN 7	AT2G34600	BolO_4g55150	Brassica oleracea var. oleracea protein TIFY 5B-like	0	0	0	0	0	0	0	0	0.166	0	0	0	0.0553333	0.001	-5.79008	0.621126	0.955245	0.001	0.001	0	1	1
JAZ8	JASMONATE ZIM-DOMAIN PROTEIN 8	AT1G30135	BolO_5g29510	Brassica oleracea var. oleracea protein TIFY 5A-like	2.066	2.85	4.195	14.714	16.501	19.495	0.17	0.175	2.694	2.694	3.259	12.432	1.013	3.037	1.58401	0.106242	0.523332	6.12833	16.9033	1.46374	0.00176533	0.00589602
JAZ9	JASMONATE ZIM-DOMAIN PROTEIN 9	AT1G70700	BolO_2g29580	Brassica oleracea var. oleracea protein TIFY 7-like	20.595	19.196	25.587	75.24	74.087	76.888	35.762	24.184	26.427	71.502	59.011	65.259	28.791	21.7927	-0.401775	0.103609	0.517656	65.2573	75.405	0.20852	0.023049	0.0584021
JAZ9	JASMONATE ZIM-DOMAIN PROTEIN 9	AT1G70700	BolO_6g36380	Brassica napus protein TIFY 7	5.115	2.642	5.951	14.491	7.339	8.593	0.788	0.887	1.936	0.567	0.323	1.341	1.20367	4.56933	1.92455	0.00013228	0.00538945	0.743667	10.141	3.7694	2.36e-17	3.26e-16
JAZ9	JASMONATE ZIM-DOMAIN PROTEIN 9	AT1G70700	BolO_6g44530	Brassica oleracea var. oleracea protein TIFY 7-like	77.184	67.946	87.16	149.163	121.874	131.625	57.836	57.285	55.41	50.615	33.869	44.343	56.8437	77.43	0.445893	0.00236767	0.0496042	42.9423	134.221	1.64413	6.05e-27	1.5e-25
JAZ10	JASMONATE ZIM-DOMAIN PROTEIN 10	AT5G13220	BolO_2g06010	Brassica napus protein TIFY 9-like	2.673	1.787	3.82	8.424	9.76	6.063	1.106	0.306	0.623	1.042	0.089	0.313	0.678333	2.76	2.0246	0.000502554	0.015223	0.481333	8.08233	4.06966	1.22e-16	1.61e-15
JAZ10	JASMONATE ZIM-DOMAIN PROTEIN 10	AT5G13220	BolO_3g05990	Brassica oleracea var. oleracea protein TIFY 9-like	7.597	3.446	3.323	12.485	16.153	16.459	0.271	0.559	0.447	1.199	0.473	0.512	0.425667	4.78867	3.49183	1.95e-09	2.65e-07	0.728	15.0323	4.36799	1.61e-36	6.45e-35
JAZ10	JASMONATE ZIM-DOMAIN PROTEIN 10	AT5G13220	BolO_9g62760	Brassica oleracea var. oleracea protein TIFY 9-like	17.901	9.556	21.281	124.149	131.265	148.524	0.299	0.441	1.17	0.651	0.612	0.548	0.636667	16.246	4.6734	2.79e-22	1.52e-19	0.603667	134.646	7.8012	3.38e-157	2.02e-154
JAZ12	JASMONATE ZIM-DOMAIN PROTEIN 12	AT5G20900	BolO_2g11700	Brassica oleracea var. oleracea protein TIFY 3B	44.228	39.11	52.271	47.631	50.305	47.008	44.056	35.176	34.345	28.583	28.839	32.455	37.859	45.203	0.255782	0.168236	0.646787	29.959	48.3147	0.689472	8.89e-08	5.56e-07
JAZ12	JASMONATE ZIM-DOMAIN PROTEIN 12	AT5G20900	BolO_9g55080	Brassica rapa protein TIFY 3B	55.787	57.284	59.873	15.436	21.001	18.825	85.173	54.715	39.314	16.579	15.152	14.802	59.734	57.648	-0.0512818	0.906646	0.981418	15.511	18.4207	0.248034	0.0909022	0.189922
JAZ13	JASMONATE ZIM-DOMAIN PROTEIN 13	AT3G22275	BolO_3g52040	Brassica napus protein JAZ13	0	0.112	0	0	0	0	0	0	0	0	0	0	0.001	0.0373333	5.22239	0.863762	0.97322	0.001	0.001	0	1	1
JAZ13	JASMONATE ZIM-DOMAIN PROTEIN 13	AT3G22275	BolO_5g42230	Brassica napus protein JAZ13	0	0	0	0	0.136	0.111	0	0	0	0	0	0	0.001	0.001	0	1	1	0.001	0.0823333	6.3634	0.639398	0.805326
MYC2	BASIC HELIX-LOOP-HELIX TRANSCRIPTION FACTOR MYC2	AT1G32640	BolO_5g39560	Transcription factor MYC2	29.799	29.253	34.974	16.594	20.035	15.734	54.192	38.755	26.904	16.16	14.855	12.738	39.9503	31.342	-0.35011	0.230832	0.738142	14.5843	17.4543	0.259166	0.0456549	0.105874
MYC2	BASIC HELIX-LOOP-HELIX TRANSCRIPTION FACTOR MYC2	AT1G32640	BolO_8g10550	Transcription factor MYC2-like	24.296	32.22	38.569	9.455	11.248	31.106	45.095	65.97	131.579	335.851	364.632	411.034	80.8813	31.695	-1.35155	0.000151389	0.00597924	370.506	17.2697	-4.42318	5.07003e-14	5.45763e-13
Indolic glucosinolates pathway
MYB34	MYB DOMAIN PROTEIN 34	AT5G60890	BolO_2g63150	Brassica rapa transcription factor MYB34	0.454	1.404	0.394	0	0	0	1.077	0.987	1.896	0	0	0	1.32	0.750667	-0.814294	0.343681	0.85117	0.001	0.001	0	1	1
MYB34	MYB DOMAIN PROTEIN 34	AT5G60890	BolO_7g46150	Myb transcription factor BoMyb34	0.109	0.044	0.75	0.33	0.057	0.047	1.393	1.387	1.451	0.105	0	0.3	1.41033	0.301	-2.2282	0.0109441	0.139565	0.135	0.144667	0.0997731	0.993057	0.995964
MYB34	MYB DOMAIN PROTEIN 34	AT5G60890	BolO_9g07870	Transcription factor MYB34-like	0	0	0	0	0	0	0	0	0	0	0	0	0.001	0.001	0	1	1	0.001	0.001	0	1	1
MYB51	MYB DOMAIN PROTEIN 51	AT1G18570	BolO_5g16930	Transcription factor MYB51 isoform X1	1.8	1.738	3.028	9.664	9.812	11.646	1.82	1.135	3.392	5.405	1.241	1.358	2.11567	2.18867	0.0489399	0.860715	0.97322	2.668	10.374	1.95914	0.00200566	0.00660424
MYB51	MYB DOMAIN PROTEIN 51	AT1G18570	BolO_8g25650	Transcription factor MYB51-like	68.917	68.265	75.89	112.276	81.511	92.526	44.427	36.742	111.923	72.444	66.065	55.152	64.364	71.024	0.142053	0.596946	0.955245	64.5537	95.4377	0.56406	3.16882e-05	0.00014244
MYB51	MYB DOMAIN PROTEIN 51	AT1G18570	BolO_8g50380	Brassica napus transcription factor MYB51-like	2.544	2.735	3.677	3.582	3.334	5.571	0.386	0	1.801	0.17	0.097	0	0.729	2.98533	2.0339	0.14572	0.60527	0.089	4.16233	5.54744	1.37e-16	1.8e-15
MYB51	MYB DOMAIN PROTEIN 51	AT1G18570	BolO_8g50390	Brassica napus transcription factor MYB51-like	23.61	19.854	26.643	48.497	47.661	51.144	2.587	1.264	16.831	1.123	0.563	0.405	6.894	23.369	1.76118	0.0695355	0.420245	0.697	49.1007	6.13844	2.52569e-125	9.58295e-123
MYB122	MYB DOMAIN PROTEIN 122	AT1G74080	BolO_2g33080	Transcription factor MYB122 isoform X1	8.601	4.874	13.047	15.53	12.266	17.86	0.51	0.105	3.28	0.859	0.575	0.045	1.29833	8.84067	2.76749	0.0181292	0.19384	0.493	15.2187	4.94811	7.75657e-10	5.93706e-09
MYB122	MYB DOMAIN PROTEIN 122	AT1G74080	BolO_6g48050	Transcription factor MYB122-like	30.553	16.999	28.785	81.033	79.204	80.595	0.48	0.049	1.028	0.142	0.054	0	0.519	25.4457	5.61554	2.90505e-10	4.42217e-08	0.0653333	80.2773	10.263	1.96935e-45	1.19195e-43
GGP1	GAMMA-GLUTAMYL PEPTIDASE 1	AT4G30530	BolO_1g07890	Brassica napus gamma-glutamyl peptidase 1-like	223.792	147.977	226.276	410.829	325.239	347.621	52.169	47.507	77.318	37.344	29.44	30.493	58.998	199.348	1.75655	4.10514e-13	9.80802e-11	32.4257	361.23	3.47771	1.24774e-140	5.64459e-138
GGP1	GAMMA-GLUTAMYL PEPTIDASE 1	AT4G30530	BolO_3g86780	Brassica napus gamma-glutamyl peptidase 1-like	195.095	132.186	204.258	511.841	401.862	426.788	28.5	28.049	69.07	27.179	19.306	21.97	41.873	177.18	2.08112	6.29856e-10	9.23711e-08	22.8183	446.83	4.29146	2.10652e-179	1.72862e-176
GGP1	GAMMA-GLUTAMYL PEPTIDASE 1	AT4G30530	BolO_7g59800	Gamma-glutamyl peptidase 1-like	67.493	69.517	77.128	153.12	139.067	126.354	104.104	50.295	58.451	63.285	48.293	54.442	70.95	71.3793	0.00870374	0.926022	0.985609	55.34	139.514	1.33401	4.17855e-23	8.37751e-22
SUR1	SUPERROOT 1	AT2G20610	BolO_7g00320	Brassica oleracea var. oleracea S-alkyl-thiohydroximate lyase SUR1	123.229	71.905	122.973	459.461	375.177	440.769	13.24	11.042	13.687	16.148	13.519	12.908	12.6563	106.036	3.06662	1.13915e-35	1.36991e-32	14.1917	425.136	4.90481	2.63242e-307	1.03208e-303
SUR1	SUPERROOT 1	AT2G20610	BolO_7g58200	Brassica oleracea var. oleracea S-alkyl-thiohydroximate lyase SUR1-like	0.539	0.365	0.659	0.597	0.692	0.869	1.191	0.567	1.793	0.522	1.11	0.613	1.18367	0.521	-1.18391	0.0255286	0.23743	0.748333	0.719333	-0.0570206	0.970541	0.987804
UGT74B1	UDP-GLUCOSYL TRANSFERASE 74B1	AT1G24100	BolO_5g23150	UDP-glycosyltransferase 74B1	34.656	20.785	30.652	47.726	35.593	41.667	6.174	7.971	9.353	1.559	0.734	0.637	7.83267	28.6977	1.87336	1.38251e-14	3.99014e-12	0.976667	41.662	5.41472	1.69306e-117	5.63598e-115
SOT16	SULFOTRANSFERASE 16	AT1G74100	BolO_2g33090	Cytosolic sulfotransferase 16-like	309.885	241.302	354.192	716.488	523.055	636.688	61.092	49.833	185.929	116.455	110.207	105.411	98.9513	301.793	1.60877	6.53246e-05	0.00303309	110.691	625.41	2.49827	4.88974e-80	7.8427e-78
SOT16	SULFOTRANSFERASE 16	AT1G74100	BolO_6g48120	Cytosolic sulfotransferase 16-like	35.822	28.627	41.75	559.551	447.421	514.614	4.07	4.68	4.538	16.116	6.092	5.234	4.42933	35.3997	2.99857	4.29204e-39	7.37352e-36	9.14733	507.195	5.79305	8.98359e-33	3.02476e-31
CYP79B2	CYTOCHROME P450, FAMILY 79, SUBFAMILY B, POLYPEPTIDE 2	AT4G39950	BolO_1g01020	Arabidopsis thaliana cytochrome P450, family 79, subfamily B, polypeptide 2 (CYP79B2)	220.747	120.635	201.892	431.383	314.544	390.187	9.868	7.924	24.129	7.409	3.546	1.653	13.9737	181.091	3.69593	4.38257e-22	2.35985e-19	4.20267	378.705	6.49362	1.84389e-30	5.54676e-29
CYP79B2	CYTOCHROME P450, FAMILY 79, SUBFAMILY B, POLYPEPTIDE 2	AT4G39950	BolO_3g76890	Arabidopsis thaliana cytochrome P450, family 79, subfamily B, polypeptide 2 (CYP79B2)	68.525	36.883	72.171	226.782	148.949	189.488	1.398	0.649	2.638	0.865	0.118	0.561	1.56167	59.193	5.24427	7.57675e-37	1.05133e-33	0.514667	188.406	8.51599	1.19161e-46	7.57606e-45
CYP79B3	CYTOCHROME P450, FAMILY 79, SUBFAMILY B, POLYPEPTIDE 3	AT2G22330	BolO_5g53950	Arabidopsis thaliana cytochrome P450, family 79, subfamily B, polypeptide 3 (CYP79B3)	11.279	4.973	9.452	20.68	10.858	18.479	0	0.07	0	0	0	0.03	0.0233333	8.568	8.52042	2.47431e-15	7.89962e-13	0.01	16.6723	10.7032	2.97552e-18	4.37111e-17
CYP83B1	CYTOCHROME P450, FAMILY 83, SUBFAMILY B, POLYPEPTIDE 1	AT4G31500	BolO_8g08770	Cytochrome P450 83B1	527.409	372.206	520.505	1117.89	799.957	938.857	101.718	74.455	149.024	62.651	26.259	24.697	108.399	473.373	2.12663	3.29e-16	1.13e-13	37.869	952.235	4.65223	7.75e-24	1.62e-22
GSTF9	GLUTATHIONE S-TRANSFERASE PHI 9	AT2G30860	BolO_3g19670	Glutathione S-transferase F9	539.544	341.552	524.566	838.524	573.628	697.188	134.098	115.499	128.359	72.186	45.908	33.79	125.985	468.554	1.89496	5.917e-19	2.48218e-16	50.628	703.113	3.79575	9.66881e-71	1.2778e-68
GSTF9	GLUTATHIONE S-TRANSFERASE PHI 9	AT2G30860	BolO_4g51640	Glutathione S-transferase F9	497.526	282.37	440.414	717.729	420.332	447.577	96.56	90.597	96.836	67.44	49.583	31.066	94.6643	406.77	2.10332	3.97068e-20	1.81329e-17	49.363	528.546	3.42053	1.9237e-19	3.07426e-18
GSTF10	GLUTATHIONE S-TRANSFERASE PHI 10	AT2G30870	BolO_3g19680	Glutathione S-transferase F10	110.887	76.754	103.835	69.652	49.029	59.481	30.689	58.776	102.468	16.535	11.532	10.83	63.9777	97.1587	0.602774	0.0725423	0.428893	12.9657	59.3873	2.19546	2.12936e-30	6.38375e-29
CYP81F1	CYTOCHROME P450 MONOOXYGENASE 81F1	AT4G37430	BolO_1g01800	Brassica rapa cytochrome P450 81F1	1.174	2.259	2.18	175.787	109.242	71.212	2.721	0.97	0.495	1.483	0.369	0.577	1.39533	1.871	0.4232	0.489511	0.932029	0.809667	118.747	7.19635	1.65786e-25	3.77415e-24
CYP81F1	CYTOCHROME P450 MONOOXYGENASE 81F1	AT4G37430	BolO_6g36800	Brassica oleracea var. oleracea cytochrome P450 81F1-like	0.209	0.231	0	0	0	0	0	0	0	0	0	0	0.001	0.146667	7.1964	0.692335	0.962927	0.001	0.001	0	1	1
CYP81F1	CYTOCHROME P450 MONOOXYGENASE 81F1	AT4G37430	BolO_6g36820	Brassica oleracea var. oleracea cytochrome P450 81F1-like	5.544	8.324	8.167	0	0	0	5.864	5.308	4.46	0	0	0	5.21067	7.345	0.495295	0.132042	0.579766	0.001	0.001	0	1	1
CYP81F2	CYTOCHROME P450 MONOOXYGENASE 81F2	AT5G57220	BolO_2g16770	Brassica napus cytochrome P450 81F2-like	135.429	85.716	135.571	345.036	323.523	362.674	2.655	3.164	56.568	4.17	0.826	1.061	20.7957	118.905	2.51546	0.0403175	0.308849	2.019	343.744	7.41155	3.55768e-28	9.51032e-27
CYP81F2	CYTOCHROME P450 MONOOXYGENASE 81F2	AT5G57220	BolO_3g14730	Brassica rapa cytochrome P450 81F2	0.416	0.177	0.694	2.945	1.682	1.673	0	0.087	0.079	0	0	0.038	0.0553333	0.429	2.95476	0.0124222	0.150914	0.0126667	2.1	7.37321	1.32548e-08	9.01866e-08
CYP81F2	CYTOCHROME P450 MONOOXYGENASE 81F2	AT5G57220	BolO_9g48500	Brassica napus cytochrome P450 81F2	38.977	30.722	44.145	52.339	46.001	57.824	9.527	5.811	18.913	3.937	2.755	1.92	11.417	37.948	1.73284	1.44122e-06	0.000111577	2.87067	52.0547	4.18057	3.1543e-95	6.70498e-93
CYP81F3	CYTOCHROME P450 MONOOXYGENASE 81F3	AT4G37400	BolO_1g01870	Brassica napus cytochrome P450 81F3	1.506	1.299	0.919	0.489	0.35	0.095	1.478	1.041	0.47	0.607	1.097	0.193	0.996333	1.24133	0.31719	0.522852	0.939802	0.632333	0.311333	-1.02223	0.229672	0.399477
CYP81F3	CYTOCHROME P450 MONOOXYGENASE 81F3	AT4G37400	BolO_3g77710	Brassica napus cytochrome P450 81F3-like	0	0.059	0.058	0	0	0	0.07	0	0	0	0	0	0.0233333	0.039	0.741082	0.845335	0.97322	0.001	0.001	0	1	1
CYP81F4	CYTOCHROME P450 MONOOXYGENASE 81F4	AT4G37410	BolO_1g01850	Cytochrome P450 81F4 [Brassica napus]	0	0	0	0.577	0	0	0	0	0	0	0	0	0.001	0.001	0	1	1	0.001	0.192333	7.58747	0.0540158	0.122093
CYP81F4	CYTOCHROME P450 MONOOXYGENASE 81F4	AT4G37410	BolO_3g77680	Brassica napus cytochrome P450 81F4-like	28.017	14.311	21.865	30.747	15.006	23.405	0	0	0	0.044	0	0	0.001	21.3977	14.3852	9.72715e-21	4.74225e-18	0.0146667	23.0527	10.6182	1.93015e-18	2.8701e-17
CYP81F4	CYTOCHROME P450 MONOOXYGENASE 81F4	AT4G37410	BolO_3g77690	Brassica napus cytochrome P450 81F4-like	157.628	76.876	101.675	142.365	86.788	113.193	0	0	0	0	0.044	0.177	0.001	112.06	16.7739	1.69922e-30	1.75151e-27	0.0736667	114.115	10.5972	1.61088e-65	1.85756e-63
IGMT1	INDOLE GLUCOSINOLATE O-METHYLTRANSFERASE 1	AT1G21100	BolO_7g23780	Brassica rapa indole glucosinolate O-methyltransferase 1	32.653	22.318	33.35	0.295	0.365	0.1	4.996	5.682	39.784	0.168	0.318	0.05	16.8207	29.4403	0.807559	0.342396	0.850905	0.178667	0.253333	0.503766	0.614024	0.791192
IGMT1	INDOLE GLUCOSINOLATE O-METHYLTRANSFERASE 1	AT1G21100	BolO_7g23800	Brassica napus indole glucosinolate O-methyltransferase 1	162.318	135.226	183.488	656.356	551.643	664.4	40.684	42.6	259.798	242.068	190.146	215.696	114.361	160.344	0.487579	0.512921	0.938741	215.97	624.133	1.53102	2.70174e-35	1.03063e-33
IGMT1	INDOLE GLUCOSINOLATE O-METHYLTRANSFERASE 1	AT1G21100	BolO_7g23810	Brassica napus indole glucosinolate O-methyltransferase 1-like	0	0	0.215	0.068	0	0.115	0	0	0	0	0	0	0.001	0.0716667	6.16323	0.513796	0.938741	0.001	0.061	5.93074	0.495086	0.692634
IGMT2	INDOLE GLUCOSINOLATE O-METHYLTRANSFERASE 2	AT1G21120	BolO_1g06800	Brassica napus indole glucosinolate O-methyltransferase 4-like	0	0	0	0	0	0	0	0	0	0	0	0	0.001	0.001	0	1	1	0.001	0.001	0	1	1
IGMT2	INDOLE GLUCOSINOLATE O-METHYLTRANSFERASE 2	AT1G21120	BolO_5g19980	Brassica napus indole glucosinolate O-methyltransferase 4	88.797	84.598	112.187	237.189	201.961	242.124	26.456	32.479	222.006	70.354	68.01	75.012	93.647	95.194	0.0236379	0.922854	0.985345	71.1253	227.091	1.67484	7.18e-45	4.22e-43
IGMT2	INDOLE GLUCOSINOLATE O-METHYLTRANSFERASE 2	AT1G21120	BolO_5g19990	Brassica napus indole glucosinolate O-methyltransferase 4	33.779	39.096	39.876	56.854	52.894	62.207	17.848	21.868	58.604	37.862	43.381	42.516	32.7733	37.5837	0.197583	0.517029	0.938741	41.253	57.3183	0.474498	5.41e-05	0.000233938
IGMT2	INDOLE GLUCOSINOLATE O-METHYLTRANSFERASE 2	AT1G21120	BolO_5g20030	Brassica napus indole glucosinolate O-methyltransferase 4	1.233	1.714	2.275	4.703	5.513	4.456	0.962	0.31	5.044	0.179	0.814	0.161	2.10533	1.74067	-0.274409	0.787107	0.970355	0.384667	4.89067	3.66835	9.58869e-14	1.0121e-12
IGMT2	INDOLE GLUCOSINOLATE O-METHYLTRANSFERASE 2	AT1G21120	BolO_7g28400	Brassica napus indole glucosinolate O-methyltransferase 4	3.28	3.7	2.92	1.601	3.57	2.624	1.488	5.544	6.126	10.071	4.977	3.422	4.386	3.3	-0.41044	0.446669	0.917681	6.15667	2.59833	-1.24456	0.00313122	0.0099057
IGMT2	INDOLE GLUCOSINOLATE O-METHYLTRANSFERASE 2	AT1G21120	BolO_7g28470	Brassica napus indole glucosinolate O-methyltransferase 4	9.489	10.943	14.865	10.25	11.871	8.851	11.01	14.684	14.696	21.342	26.67	15.705	13.4633	11.7657	-0.194453	0.487517	0.931559	21.239	10.324	-1.04071	6.64e-06	3.29e-05
FOX1	FAD-LINKED OXIDOREDUCTASE 1	AT1G26380	BolO_1g14070	Brassica oleracea var. oleracea reticuline oxidase-like protein	0	0	0	0	0	0	0	0	0	0	0	0	0.001	0.001	0	1	1	0.001	0.001	0	1	1
FOX1	FAD-LINKED OXIDOREDUCTASE 1	AT1G26380	BolO_1g14080	Brassica oleracea var. oleracea reticuline oxidase-like protein	0	0	0	0	0	0	0	0	0	0	0	0	0.001	0.001	0	1	1	0.001	0.001	0	1	1
FOX1	FAD-LINKED OXIDOREDUCTASE 1	AT1G26380	BolO_5g24930	Brassica oleracea var. oleracea reticuline oxidase-like protein	115.647	75.35	119.761	526.092	415.333	442.48	4.284	3.358	17.881	7.124	2.608	1.718	8.50767	103.586	3.60592	7.85e-07	6.43e-05	3.81667	461.302	6.91725	7.4e-30	2.14e-28
FOX1	FAD-LINKED OXIDOREDUCTASE 1	AT1G26380	BolO_5g24940	Brassica oleracea var. oleracea reticuline oxidase-like protein	68.283	43.283	67.537	338.298	401.687	353.759	0.128	0.088	0.12	0.508	0.386	0.343	0.112	59.701	9.05811	1.53e-57	6.13e-54	0.412333	364.581	9.78821	9.1e-243	1.78e-239
CYP71A12/A13	CYTOCHROME P450, FAMILY 71, SUBFAMILY A, POLYPEPTIDE 12/13	AT2G30750/AT2G30770	BolO_3g19650	Brassica oleracea var. oleracea indoleacetaldoxime dehydratase	0	0	0	0	0.309	0	0	0	0	0.992	0.323	0.51	0.001	0.001	0	1	1	0.608333	0.103	-2.56222	0.131706	0.257287
ASA1	ANTHRANILATE SYNTHASE ALPHA SUBUNIT 1	AT5G05730	BolO_3g02760	Brassica oleracea var. oleracea anthranilate synthase alpha subunit 1	90.157	64.035	82.401	182.079	133.224	152.453	20.469	23.43	35.326	22.422	22.672	23.036	26.4083	78.8643	1.57838	1.2e-11	2.31e-09	22.71	155.919	2.77939	3.1e-89	5.94e-87
ASA1	ANTHRANILATE SYNTHASE ALPHA SUBUNIT 1	AT5G05730	BolO_9g69290	Brassica oleracea var. oleracea anthranilate synthase alpha subunit 1	280.444	140.707	239.702	534.343	425.077	459.88	3.987	4.079	6.602	3.654	2.006	2.879	4.88933	220.284	5.49359	2.34e-76	2.11e-72	2.84633	473.1	7.3769	0	0
ASA2	ANTHRANILATE SYNTHASE ALPHA SUBUNIT 2	AT2G29690	BolO_3g30720	Brassica napus anthranilate synthase alpha subunit 2, chloroplastic	16.846	14.23	17.109	32.233	26.95	26.698	13.759	11.378	10.411	15.627	13.122	15.242	11.8493	16.0617	0.438816	0.0230673	0.223349	14.6637	28.627	0.965131	9.66e-12	8.63e-11
ASA2	ANTHRANILATE SYNTHASE ALPHA SUBUNIT 2	AT2G29690	BolO_4g33300	Brassica rapa anthranilate synthase alpha subunit 2, chloroplastic	0	0	0	0	0	0	0	0	0	0	0	0	0.001	0.001	0	1	1	0.001	0.001	0	1	1
ASB1	ANTHRANILATE SYNTHASE BETA SUBUNIT 1	AT1G25220	BolO_3g71850	Brassica oleracea var. oleracea anthranilate synthase beta subunit 1, chloroplastic-like	149.31	86.5	149.061	391.587	323.396	346.139	18.152	14.979	26.013	15.491	7.338	8.817	19.7147	128.29	2.70207	2.41e-22	1.37e-19	10.5487	353.707	5.06742	1.11e-136	4.67e-134
ASB1	ANTHRANILATE SYNTHASE BETA SUBUNIT 1	AT1G25220	BolO_5g25710	Brassica oleracea var. oleracea anthranilate synthase beta subunit 1, chloroplastic	47.866	36.26	44.975	99.195	86.181	99.351	11.847	16.47	17.758	15.251	11.455	11.856	15.3583	43.0337	1.48644	6.22e-13	1.45e-10	12.854	94.909	2.88433	5.29e-93	1.09e-90
ASB2	ANTHRANILATE SYNTHASE BETA SUBUNIT 2	AT5G57890	BolO_7g19830	Brassica napus anthranilate synthase beta subunit 2	0.382	0.948	0.517	0.131	0.135	0.665	0.628	0.389	0.234	0.124	0	0.224	0.417	0.615667	0.562102	0.583225	0.954218	0.116	0.310333	1.41969	0.416253	0.617943
PAT1	PHOSPHORIBOSYLANTHRANILATE TRANSFERASE 1	AT5G17990	BolO_9g58070	Brassica napus anthranilate phosphoribosyltransferase, chloroplastic	60.344	46.768	69.59	95.668	75.753	81.773	35.13	38.676	29.999	30.485	29.381	27.922	34.6017	58.9007	0.767442	0.000168639	0.00646103	29.2627	84.398	1.52815	6.24e-33	2.11e-31
PAT1	PHOSPHORIBOSYLANTHRANILATE TRANSFERASE 1	AT5G17990	BolO_2g09280	Brassica oleracea var. oleracea anthranilate phosphoribosyltransferase, chloroplastic	17.933	14.019	16.821	14.462	11.843	12.737	10.581	12.889	14.648	11.472	11.133	11.559	12.706	16.2577	0.35561	0.0460249	0.33369	11.388	13.014	0.19255	0.102898	0.210339
PAI1	PHOSPHORIBOSYLANTHRANILATE ISOMERASE 1	AT1G07780	BolO_2g02470	Brassica oleracea var. oleracea N-(5'-phosphoribosyl)anthranilate isomerase 1, chloroplastic-like	9.003	8.954	12.11	4.187	2.228	4.47	9.827	8.246	10.501	5.482	5.627	3.685
IGPS	INDOLE-3-GLYCEROL PHOSPHATE SYNTHASE	AT2G04400	BolO_3g54660	Brassica oleracea var. oleracea indole-3-glycerol phosphate synthase, chloroplastic	101.548	63.041	98.548	168.116	130.258	133.866	15.035	13.157	15.365	6.098	5.795	6.183	14.519	87.7123	2.59484	3.85e-30	3.7e-27	6.02533	144.08	4.57969	3.56e-186	3.22e-183
IGPS	INDOLE-3-GLYCEROL PHOSPHATE SYNTHASE	AT2G04400	BolO_6g02310	Brassica rapa indole-3-glycerol phosphate synthase, chloroplastic	0	0	0	0	0	0	0	0	0	0	0	0	0.001	0.001	0	1	1	0.001	0.001	0	1	1
IGPS	INDOLE-3-GLYCEROL PHOSPHATE SYNTHASE	AT2G04400	BolO_3g53800	Brassica rapa indole-3-glycerol phosphate synthase, chloroplastic	0	0	0	0	0	0	0	0	0	0	0	0	0.001	0.001	0	1	1	0.001	0.001	0	1	1
IGPS	INDOLE-3-GLYCEROL PHOSPHATE SYNTHASE	AT2G04400	BolO_3g53470	Brassica napus indole-3-glycerol phosphate synthase, chloroplastic-like	0	0	0	0	0	0	0	0	0	0	0	0	0.001	0.001	0	1	1	0.001	0.001	0	1	1
IGPS	INDOLE-3-GLYCEROL PHOSPHATE SYNTHASE	AT2G04400	BolO_7g40280	Brassica oleracea var. oleracea indole-3-glycerol phosphate synthase, chloroplastic	8.903	8.55	7.136	9.181	9.65	7.288	9.34	11.537	15.501	21.723	24.121	20.85	12.126	8.19633	-0.565053	0.0275535	0.247521	22.2313	8.70633	-1.35246	1.13e-14	1.29e-13
TSA1	TRYPTOPHAN SYNTHASE ALPHA CHAIN 1	AT3G54640	BolO_8g36990	Brassica oleracea var. oleracea tryptophan synthase alpha chain	660.982	422.575	615.288	1144.03	824.984	964.487	59.9	66.607	94.209	51.428	44.149	44.111	73.572	566.282	2.94429	3.13e-36	4.18e-33	46.5627	977.832	4.39234	9.29e-216	1.09e-212
TSA1	TRYPTOPHAN SYNTHASE ALPHA CHAIN 1	AT3G54640	BolO_9g02160	Brassica oleracea var. oleracea tryptophan synthase alpha chain	9.79	11.194	7.516	9.5	7.871	10.345	7.97	7.132	8.088	6.943	8.548	7.715	7.73	9.5	0.297459	0.183475	0.670034	7.73533	9.23867	0.256221	0.128757	0.252309
TSB1	TRYPTOPHAN SYNTHASE BETA-SUBUNIT 1	AT5G54810	BolO_9g44620	Brassica oleracea var. oleracea tryptophan synthase beta chain 1	280.533	178.618	267.828	559.861	390.457	433.891	40.784	41.181	51.853	30.849	27.281	22.232	44.606	242.326	2.44164	3.89e-30	3.7e-27	26.7873	461.403	4.1064	1.3e-146	6.31e-144
TSB2	TRYPTOPHAN SYNTHASE BETA-SUBUNIT 2	AT4G27070	BolO_7g57280	Brassica oleracea var. oleracea tryptophan synthase beta chain 2	8.864	6.029	7.521	19.19	13.822	14.714	2.679	5.25	5.563	2.766	2.071	1.808	4.49733	7.47133	0.732296	0.0156759	0.175524	2.215	15.9087	2.84443	1.65e-37	6.91e-36
TSB2	TRYPTOPHAN SYNTHASE BETA-SUBUNIT 2	AT4G27070	BolO_7g57300	Brassica napus tryptophan synthase beta chain 2, chloroplastic-like	0	0	0	0	0	0	0	0	0	0	0	0	0.001	0.001	0	1	1	0.001	0.001	0	1	1
TSB2	TRYPTOPHAN SYNTHASE BETA-SUBUNIT 2	AT4G27070	BolO_7g03310	Brassica oleracea var. oleracea tryptophan synthase beta chain 2	0	0	0	0	0	0	0	0	0	0	0	0	0.001	0.001	0	1	1	0.001	0.001	0	1	1
WRKY33	WRKY DNA-BINDING PROTEIN 33	AT2G38470	BolO_4g58490	Brassica oleracea var. gongylodes transcription factor WRKY33	52.635	50.441	70.373	76.068	73.531	90.628	24.316	44.644	103.346	97.762	124.281	150.337	57.4353	57.8163	0.00953858	0.882087	0.975782	124.127	80.0757	-0.632377	0.000861188	0.00305436
WRKY33	WRKY DNA-BINDING PROTEIN 33	AT2G38470	BolO_3g24750	Brassica oleracea var. oleracea probable WRKY transcription factor 33	156.45	163.094	201.119	225.237	249.729	301.094	62.736	96.523	224.985	308.95	400.751	466.615	128.081	173.554	0.438327	0.195405	0.690395	392.105	258.687	-0.600036	0.00170308	0.00570755

## Sheet: Table S3
Table S3. DAMs identified in Bo257 (R_mock vs. R_Ab) after Ab infection.
Index	Compounds	Class	Level of metabolite	R_mock1	R_mock2	R_mock3	R_Ab1	R_Ab2	R_Ab3	R_mock_mean	R_Ab_mean	FC(R_Ab_mean/R_mock_mean)	log2_FC(R_Ab_mean/R_mock_mean)	Pvalue	FDR	VIP
Com_55_pos	Isoleucine	Amino acid and derivatives	Primary metabolites	284000000	231200000	280900000	160600000	198000000	187800000	2.65367e+08	1.82133e+08	0.686346	-0.542992	0.0151628	0.504612	9.48678
Com_54_pos	D-glutamine	Amino acid and derivatives	Primary metabolites	126200000	112900000	144600000	51450000	74430000	57820000	127900000	6.12333e+07	0.478759	-1.06263	0.0043502	0.34553	8.81519
Com_186_pos	Glutamine	Amino acid and derivatives	Primary metabolites	166100000	152000000	192600000	98270000	121700000	92200000	1.70233e+08	1.04057e+08	0.611259	-0.710144	0.0113671	0.500865	8.77314
Com_198_pos	Cycloleucine	Amino acid and derivatives	Primary metabolites	155400000	113900000	168700000	82130000	103700000	88420000	146000000	9.14167e+07	0.626142	-0.675439	0.0368076	0.531559	7.59241
Com_170_pos	N-Methyl-a-aminoisobutyric acid	Amino acid and derivatives	Primary metabolites	108300000	72560000	114600000	45550000	58220000	53000000	9.84867e+07	5.22567e+07	0.530596	-0.914313	0.0272753	0.504612	6.92705
Com_194_pos	Dl-Alanyl-glycine	Amino acid and derivatives	Primary metabolites	89990000	84090000	107800000	55760000	69980000	50720000	93960000	58820000	0.626011	-0.67574	0.0185677	0.504612	6.39048
Com_220_pos	Lysine	Amino acid and derivatives	Primary metabolites	72190000	67620000	96320000	44370000	53450000	42100000	78710000	46640000	0.592555	-0.754979	0.0283977	0.504612	5.99127
Com_202_pos	Ala-gly	Amino acid and derivatives	Primary metabolites	34630000	29990000	47780000	13290000	18250000	15050000	3.74667e+07	15530000	0.414502	-1.27055	0.0165034	0.504612	4.94605
Com_275_pos	D-Serine	Amino acid and derivatives	Primary metabolites	41080000	36220000	39070000	19020000	18960000	22080000	38790000	20020000	0.516112	-0.954243	0.000424606	0.314854	4.46052
Com_98_pos	Trans-3-Hydroxy-L-proline	Amino acid and derivatives	Primary metabolites	31450000	24940000	33700000	16620000	21050000	18660000	30030000	1.87767e+07	0.625264	-0.677464	0.0182819	0.504612	3.51643
Com_307_pos	Leucine	Amino acid and derivatives	Primary metabolites	17170000	13660000	19230000	9151000	11460000	10420000	1.66867e+07	1.03437e+07	0.619876	-0.689948	0.0225834	0.504612	2.62813
Com_734_neg	L-Asparagine	Amino acid and derivatives	Primary metabolites	10170000	10230000	12950000	5280000	7751000	8688000	1.11167e+07	7.23967e+06	0.651244	-0.618729	0.0472369	0.550206	2.01506
Com_576_pos	D-Threonine	Amino acid and derivatives	Primary metabolites	5771000	4547000	5173000	2268000	2588000	3595000	5.16367e+06	2817000	0.545543	-0.874236	0.0117109	0.500865	1.50456
Com_886_neg	L-Histidine	Amino acid and derivatives	Primary metabolites	3948000	2958000	4241000	1429000	2314000	2404000	3.71567e+06	2049000	0.551449	-0.858701	0.0285554	0.504612	1.32525
Com_748_neg	Ureidosuccinic acid	Amino acid and derivatives	Primary metabolites	3826000	3708000	3856000	2011000	2457000	2865000	3.79667e+06	2.44433e+06	0.64381	-0.635292	0.00571518	0.381954	1.19601
Com_382_pos	6-Aminocaproic acid	Lipids	Primary metabolites	29700000	23130000	32870000	15750000	19880000	17640000	2.85667e+07	1.77567e+07	0.621587	-0.685972	0.0253616	0.504612	3.42308
Com_385_pos	Diethyl glutarate	Lipids	Primary metabolites	61580000	61410000	62670000	64790000	63970000	65070000	6.18867e+07	64610000	1.04401	0.0621289	0.00611679	0.381954	1.70253
Com_752_neg	Succinate	Organic acid and its derivatives	Primary metabolites	4595000	4713000	9472000	15590000	11760000	11830000	6260000	13060000	2.08626	1.06092	0.0292259	0.504612	2.52567
Com_689_neg	Methylmalonate	Organic acid and its derivatives	Primary metabolites	1805000	1790000	3800000	6195000	4785000	4913000	2465000	5.29767e+06	2.14915	1.10377	0.0244887	0.504612	1.63781
Com_1_pos	Adenosine	Nucleotide and its derivates	Primary metabolites	3946200	4406000	4619500	3513000	3190400	3280000	4323900	3327800	0.769629	-0.377764	0.0107117	0.500865	1.01042
Com_234_pos	Trigonelline	Alkaloids and derivatives	Secondary metabolites	17790000	24110000	25310000	7463000	9496000	14070000	2.24033e+07	10343000	0.461672	-1.11506	0.0166254	0.504612	3.53155
Com_636_pos	6-Deoxyfagomine	Alkaloids and derivatives	Secondary metabolites	6295000	5094000	7034000	3302000	4262000	3657000	6141000	3.74033e+06	0.609076	-0.715307	0.0190243	0.504612	1.63432
Com_279_pos	1-Aminocyclopropanecarboxylic acid	Phytohormones	Secondary metabolites	8826000	6991000	9722000	4742000	5620000	4739000	8513000	5.03367e+06	0.591292	-0.758058	0.0152635	0.504612	1.95651
Com_127_pos	Methional	Organosulfur compounds	Secondary metabolites	4877000	4869000	5546000	3423000	3648000	4503000	5.09733e+06	3858000	0.756866	-0.40189	0.0357883	0.523639	1.08603

## Sheet: Table S4
Table S4. DAMs identified in Bo190 ((S_mock vs. S_Ab) after Ab infection.
Index	Compounds	Class	Level of metabolite	S_mock1	S_mock2	S_mock3	S_Ab1	S_Ab2	S_Ab3	S_mock_mean	S_Ab_mean	FC(S_Ab_mean/S_mock_mean)	log2_FC(S_Ab_mean/S_mock_mean)	Pvalue	FDR	VIP
Com_65_pos	L-arginine	Amino acid and derivatives	Primary metabolites	151200000	135100000	173900000	86460000	52770000	49690000	153400000	6.29733e+07	0.410517	-1.28449	0.0051531	0.0578416	9.44349
Com_170_pos	N-Methyl-a-aminoisobutyric acid	Amino acid and derivatives	Primary metabolites	125000000	131200000	154200000	97570000	60120000	71610000	136800000	7.64333e+07	0.558723	-0.839794	0.0131396	0.0875775	7.52814
Com_78_pos	L-Glutamic acid	Amino acid and derivatives	Primary metabolites	120800000	119800000	119000000	83860000	63090000	79640000	1.19867e+08	75530000	0.630117	-0.666309	0.00222566	0.0399183	6.6935
Com_56_pos	L-Leucine	Amino acid and derivatives	Primary metabolites	138100000	121000000	146100000	105300000	85450000	93300000	1.35067e+08	9.46833e+07	0.701012	-0.512489	0.0126249	0.086128	6.19416
Com_51_pos	Pipecolic acid	Amino acid and derivatives	Primary metabolites	28110000	17860000	24460000	46580000	60980000	84960000	2.34767e+07	6.41733e+07	2.73349	1.45075	0.0246329	0.112374	6.12949
Com_52_pos	L-Tryptophan	Amino acid and derivatives	Primary metabolites	76670000	75380000	67340000	52210000	33100000	28330000	73130000	37880000	0.517982	-0.949027	0.0109419	0.0806461	5.86642
Com_189_pos	Proline	Amino acid and derivatives	Primary metabolites	56000000	52040000	63070000	31570000	23480000	31620000	5.70367e+07	28890000	0.506516	-0.981319	0.00260275	0.0431978	5.29973
Com_68_pos	D-Proline	Amino acid and derivatives	Primary metabolites	68660000	62410000	78160000	43650000	37430000	43100000	6.97433e+07	4.13933e+07	0.59351	-0.752657	0.00474377	0.0578416	5.27345
Com_188_pos	Valine	Amino acid and derivatives	Primary metabolites	110300000	123400000	133300000	109300000	91270000	91260000	1.22333e+08	9.72767e+07	0.795177	-0.330652	0.0491829	0.160857	4.57095
Com_173_pos	L-Methionine sulfone	Amino acid and derivatives	Primary metabolites	58100000	58260000	52330000	48530000	26970000	34260000	56230000	3.65867e+07	0.650661	-0.620022	0.0413523	0.142638	4.1653
Com_322_pos	N-acetylglycine	Amino acid and derivatives	Primary metabolites	3709000	3716000	4714000	12540000	18630000	18660000	4.04633e+06	16610000	4.10495	2.03736	0.003671	0.052496	3.55632
Com_190_pos	Dl-Norleucine	Amino acid and derivatives	Primary metabolites	3239000	3409000	3525000	9224000	13310000	17580000	3391000	1.33713e+07	3.94318	1.97936	0.0144385	0.0905644	3.09313
Com_50_pos	L-Pipecolate	Amino acid and derivatives	Primary metabolites	8399000	3201000	5037000	11540000	14760000	19530000	5.54567e+06	1.52767e+07	2.7547	1.4619	0.0247587	0.112374	2.98011
Com_115_pos	Nicotianamine	Amino acid and derivatives	Primary metabolites	22780000	22680000	23540000	28590000	36880000	28940000	23000000	31470000	1.36826	0.452343	0.035753	0.130781	2.73159
Com_734_neg	L-Asparagine	Amino acid and derivatives	Primary metabolites	15610000	18650000	17280000	9551000	9452000	10430000	17180000	9811000	0.571071	-0.808258	0.00138617	0.0350322	2.72728
Com_307_pos	Leucine	Amino acid and derivatives	Primary metabolites	18570000	18250000	23560000	16260000	11620000	13030000	2.01267e+07	1.36367e+07	0.677542	-0.561617	0.04199	0.14367	2.3505
Com_210_pos	D-Pyroglutamic acid	Amino acid and derivatives	Primary metabolites	13990000	16750000	13120000	10980000	8214000	8715000	14620000	9303000	0.63632	-0.652175	0.0185241	0.0971641	2.23483
Com_200_pos	Aspartic Acid	Amino acid and derivatives	Primary metabolites	16740000	19060000	20100000	22230000	24550000	22190000	1.86333e+07	22990000	1.23381	0.303121	0.026059	0.11327	2.01352
Com_158_pos	S-ribosyl-L-homocysteine	Amino acid and derivatives	Primary metabolites	1971000	2016000	1873000	4121000	5360000	6749000	1.95333e+06	5410000	2.76962	1.46969	0.0104421	0.0784568	1.83309
Com_61_pos	DL-Citrulline	Amino acid and derivatives	Primary metabolites	3759000	3530000	5733000	1624000	1117000	1006000	4.34067e+06	1249000	0.287744	-1.79714	0.0129905	0.087548	1.70042
Com_806_neg	alpha-Amino-beta-(3-indolyl)-propionic acid	Amino acid and derivatives	Primary metabolites	5013000	4482000	3588000	2587000	1382000	1118000	4361000	1.69567e+06	0.388825	-1.36281	0.0122611	0.0855975	1.61492
Com_805_neg	DL-o-Tyrosine	Amino acid and derivatives	Primary metabolites	4775000	4735000	4418000	3023000	1959000	1677000	4.64267e+06	2.21967e+06	0.478102	-1.06461	0.00468248	0.0578416	1.55939
Com_191_pos	DL-Leucine	Amino acid and derivatives	Primary metabolites	7319000	6170000	7974000	5342000	4089000	4591000	7.15433e+06	4674000	0.65331	-0.61416	0.0179767	0.095985	1.5179
Com_341_pos	2-Aminoadipic acid	Amino acid and derivatives	Primary metabolites	1514000	1007000	1505000	3342000	3168000	2734000	1342000	3.08133e+06	2.29608	1.19917	0.00212641	0.0397909	1.32308
Com_748_neg	Ureidosuccinic acid	Amino acid and derivatives	Primary metabolites	3373000	3521000	3690000	2115000	2089000	2239000	3528000	2.14767e+06	0.608749	-0.71608	0.000176638	0.0203132	1.19305
Com_798_neg	D-Galactonic acid	Organic acid and its derivatives	Primary metabolites	1421000	2057000	2122000	5221000	4017000	5781000	1.86667e+06	5.00633e+06	2.68196	1.42329	0.00518047	0.0578416	1.77582
Com_95_pos	alpha-Keto-gamma-(methylthio)butyric acid	Organic acid and its derivatives	Primary metabolites	19270000	20870000	19900000	22300000	22510000	24010000	2.00133e+07	22940000	1.14624	0.196904	0.0147019	0.0905644	1.67943
Com_673_pos	Dibutyl phthalate	Organic acid and its derivatives	Primary metabolites	24020000	24360000	23470000	25950000	26650000	26970000	23950000	2.65233e+07	1.10745	0.147236	0.00293151	0.0467324	1.60689
Com_672_pos	Diisobutyl phthalate	Organic acid and its derivatives	Primary metabolites	11990000	12820000	12660000	13420000	14570000	14310000	12490000	14100000	1.1289	0.174922	0.0202186	0.102137	1.23336
Com_1067_neg	Fumaric Acid	Organic acid and its derivatives	Primary metabolites	3193000	3295000	3468000	4702000	4746000	4843000	3.31867e+06	4.76367e+06	1.43542	0.521469	8.96607e-05	0.0166171	1.23329
Com_954_neg	L(-)-Malic acid	Organic acid and its derivatives	Primary metabolites	106700000	109300000	117000000	145700000	143000000	164000000	111000000	150900000	1.35946	0.443033	0.00540964	0.0578416	6.33465
Com_752_neg	Succinate	Organic acid and its derivatives	Primary metabolites	5662000	6890000	6446000	24420000	23130000	23880000	6.33267e+06	23810000	3.75987	1.91068	4.61838e-06	0.00256782	4.28912
Com_689_neg	Methylmalonate	Organic acid and its derivatives	Primary metabolites	2383000	2703000	2647000	10150000	9829000	9821000	2.57767e+06	9.93333e+06	3.85361	1.94621	9.42853e-07	0.00104845	2.78265
Com_221_pos	D-Myo-inositol 4-monophosohate	Organic acid and its derivatives	Primary metabolites	2381000	2396000	2683000	8018000	9314000	6533000	2.48667e+06	7955000	3.19906	1.67765	0.00250318	0.0428236	2.34336
Com_737_neg	2,6-Dihydroxypurine	Nucleotide and its derivates	Primary metabolites	360400	311300	495600	2168000	1705000	2853000	389100	2242000	5.76201	2.52657	0.00539056	0.0578416	1.36096
Com_835_neg	UDP	Nucleotide and its derivates	Primary metabolites	7784000	6840000	7486000	5914000	5140000	6363000	7370000	5.80567e+06	0.787743	-0.344203	0.0259756	0.11327	1.19282
Com_544_pos	Xanthurenic acid O-hexoside	Nucleotide and its derivates	Primary metabolites	1439000	1943000	1613000	2402000	3298000	2806000	1665000	2.83533e+06	1.7029	0.767996	0.017192	0.0951119	1.05031
Com_272_pos	VitaMin U	Vitamins	Primary metabolites	43440000	46400000	49280000	36140000	20330000	25030000	4.63733e+07	2.71667e+07	0.585825	-0.771458	0.018213	0.095985	4.21946
Com_675_pos	pyridoxal	Vitamins	Primary metabolites	1028000	1215000	949400	1854000	2860000	2579000	1.06413e+06	2431000	2.28449	1.19187	0.0115903	0.084238	1.14525
Com_34_pos	D-Arabitol	Carbohydrates and its derivatives	Primary metabolites	184200000	192700000	198900000	138200000	92840000	76170000	1.91933e+08	1.02403e+08	0.533536	-0.906343	0.00925482	0.0736237	9.32085
Com_800_neg	D-Gluconic acid	Carbohydrates and its derivatives	Primary metabolites	2195000	3173000	3321000	8205000	6190000	8990000	2.89633e+06	7795000	2.69133	1.42832	0.00565756	0.059351	2.21515
Com_834_neg	s7p	Carbohydrates and its derivatives	Primary metabolites	1086000	1535000	1402000	1856000	3274000	3402000	1341000	2844000	2.12081	1.08461	0.0428124	0.145145	1.15275
Com_378_pos	LysoPC 16:0 (2n isomer)	Lipids	Primary metabolites	2162000	1566000	1907000	681200	382100	633300	1.87833e+06	565533	0.301083	-1.73177	0.00258418	0.0431978	1.15427
Com_372_pos	Octadeca-11E,13E,15Z-trienoic acid	Lipids	Primary metabolites	7872000	7780000	8252000	8948000	9308000	9095000	7968000	9117000	1.1442	0.194342	0.00298381	0.0467324	1.08007
Com_1042_neg	5-O-p-Coumaroylquinic acid	Phenolic acids	Secondary metabolites	20800000	22020000	21280000	27120000	24830000	31420000	2.13667e+07	27790000	1.30062	0.379204	0.0307718	0.119914	2.42295
Com_147_pos	Cinnamic Acid	Phenolic acids	Secondary metabolites	3657000	3165000	3602000	2257000	1571000	2028000	3.47467e+06	1952000	0.561781	-0.831922	0.00393601	0.0537099	1.23322
Com_192_pos	Dl-Indole-3-lactic acid	Organoheterocyclic compounds	Secondary metabolites	113300000	109100000	98540000	80610000	51990000	45270000	106980000	59290000	0.554216	-0.85148	0.0151078	0.0905644	6.77293
Com_211_pos	Indole	Organoheterocyclic compounds	Secondary metabolites	20300000	19470000	16270000	10900000	6162000	5145000	18680000	7.40233e+06	0.396271	-1.33544	0.00639407	0.0612949	3.35779
Com_134_pos	Indole-3-acetamide	Organoheterocyclic compounds	Secondary metabolites	5347000	6300000	7023000	2579000	1486000	1888000	6.22333e+06	1.98433e+06	0.318854	-1.64903	0.00187478	0.038901	2.06075
Com_396_pos	1,4-dihydro-1-Methyl-4-oxo-3-pyridinecarboxamide	Organoheterocyclic compounds	Secondary metabolites	582400	543000	873700	4029000	3709000	4815000	666367	4.18433e+06	6.27933	2.65061	0.000519565	0.0288878	1.91322
Com_83_pos	Hypoxanthine	Organoheterocyclic compounds	Secondary metabolites	103400	103600	187600	1788000	2288000	3162000	131533	2.41267e+06	18.3426	4.19713	0.00477959	0.0578416	1.51193
Com_92_pos	Beta-Nicotyrine	Alkaloids and derivatives	Secondary metabolites	5071000	4780000	3986000	2754000	1602000	1238000	4.61233e+06	1.86467e+06	0.404278	-1.30658	0.00801974	0.0685996	1.65194
Com_316_pos	Vasicine	Alkaloids and derivatives	Secondary metabolites	4949000	4357000	3648000	2414000	1307000	1094000	4318000	1605000	0.3717	-1.42779	0.00814943	0.0687272	1.64264
Com_581_pos	Betaine	Alkaloids and derivatives	Secondary metabolites	3078000	3896000	3893000	12280000	20010000	25700000	3.62233e+06	19330000	5.33634	2.41585	0.0157435	0.0912009	3.87154
Com_603_pos	O-Phosphocholine	Amines	Secondary metabolites	4103000	4975000	2322000	8039000	8800000	10000000	3800000	8.94633e+06	2.3543	1.2353	0.00600007	0.0610374	2.24544
Com_589_pos	Spermine	Polyamine	Secondary metabolites	2258000	1860000	1513000	823800	520700	634600	1877000	659700	0.351465	-1.50855	0.00637601	0.0612949	1.1057
